# Supplementary material for: A Highly Sensitive and Flexible Capacitive Pressure Sensor Based on a Porous Three-Dimensional PDMS/Microsphere Composite
Source: PubMed Central journal article supplement (PMC7361688; doi:10.3390/polym12061412), 2020-06-24
Supplement: polymers-12-01412-s001.pdf [file polymers-12-01412-s001.pdf]

## Supporting Information

### A Highly Sensitive and Flexible Capacitive Pressure Sensor Based on a Porous Three-Dimensional PDMS/Microsphere Composite

*Young Jung<sup>1,2</sup>, Wookjin Lee<sup>1</sup>, Kyungkuk Jung<sup>2,3</sup>, Byunggeon Park<sup>1,2</sup>, Jinhyoung Park<sup>1</sup>, Jongsoo Ko<sup>2</sup>, Hanchul Cho<sup>1,\*</sup>*

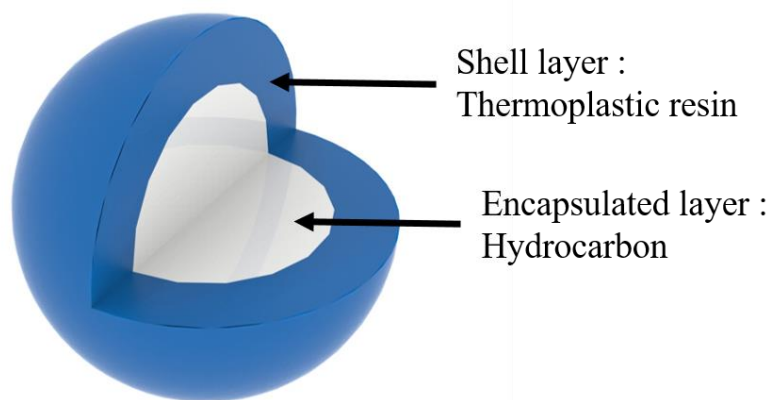

**Figure S1.** The structure of the microsphere. The microsphere consists of thermoplastic resin and hydrocarbon.

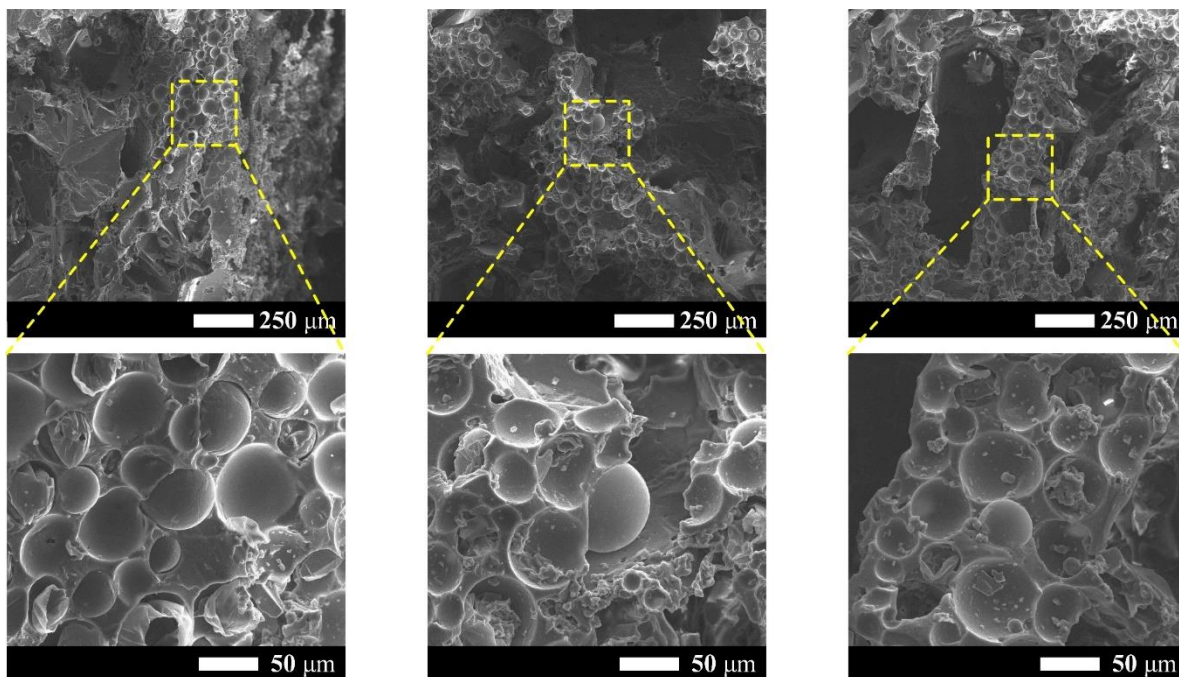

**Figure S2.** SEM images of the various parts of the PDMS/MS composite. The MS are densely arrayed onto the PDMS structure. Some of the MS disappeared or popped because of the cutting force applied to the device during cutting.

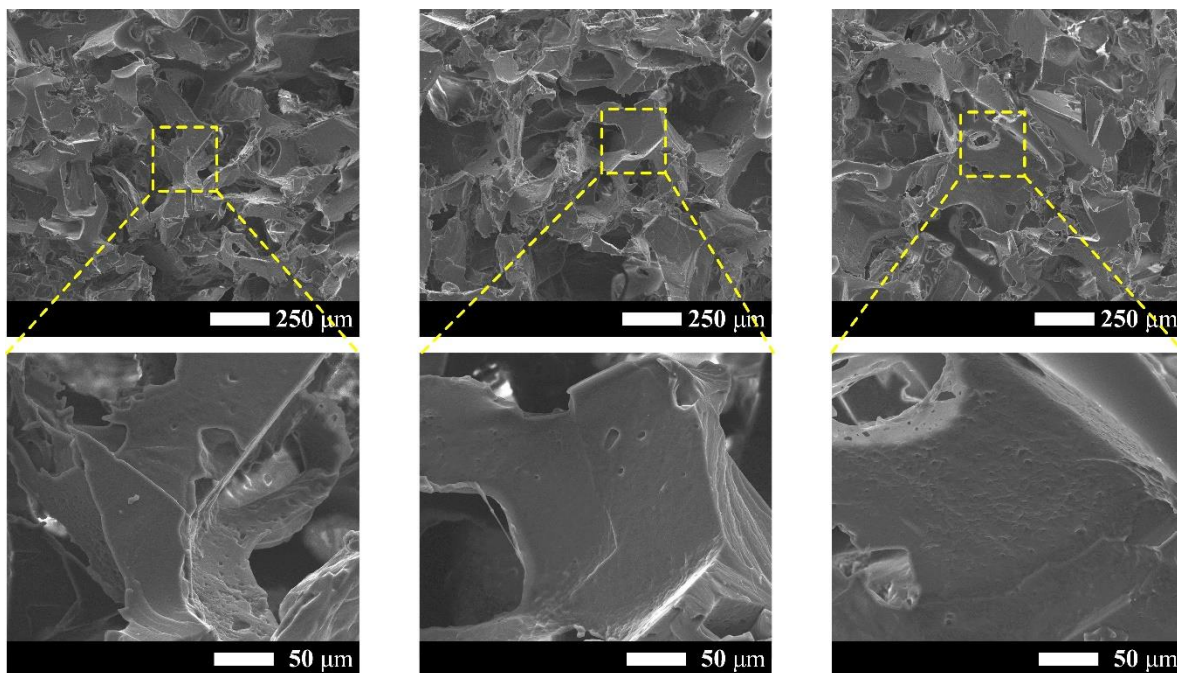

**Figure S3.** SEM images of the porous PDMS structure. The porous PDMS structure only consists of the PDMS support structure with smooth surface

**Figure S4.** Porosity calculation results of the porous PDMS structure and PDMS/MS composite. The volume of the porous structure and bulk was equal to  $16 \times 16 \times 10 \text{ cm}^3$ .

$$P = \left( \frac{D_s}{D_b} \right) = \frac{\left( \frac{W}{V} \right)_s}{\left( \frac{W}{V} \right)_b} = \frac{W_s}{W_b} \quad (\text{S1})$$

Where,  $D_s$  is the density of the porous structure,  $D_b$  is the density of bulk,  $W_s$  is the weight, and  $V_s$  is the volume of the porous structure.  $W_b$  is the weight, and  $V_b$  is the volume of the bulk, respectively.

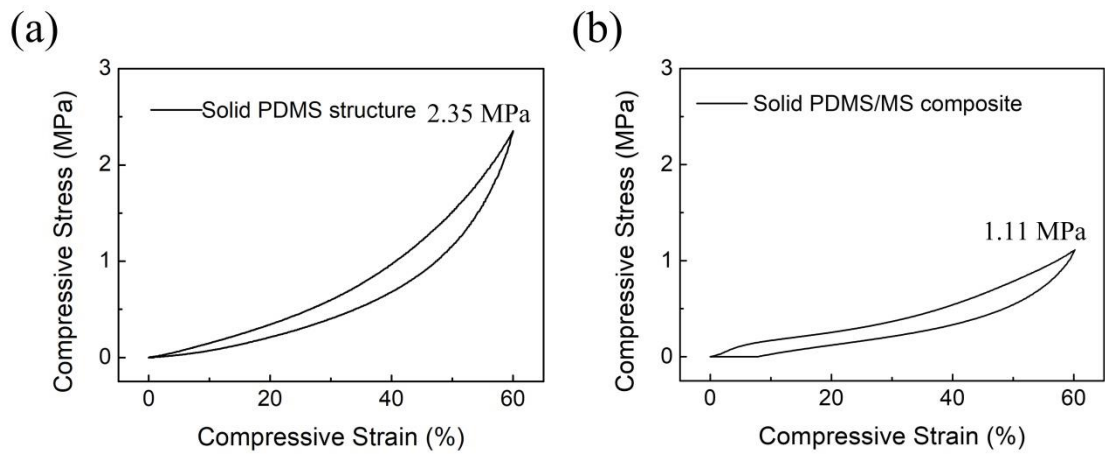

**Figure S5.** The measured compressive stress-strain curves of the bare solid PDMS structure and PDMS/MS composite for FE simulations. (a) Solid PDMS structure. (b) Solid PDMS/MS composite. Solid PDMS/MS composite is more easily compressed than solid PDMS structure when the microsphere is added.

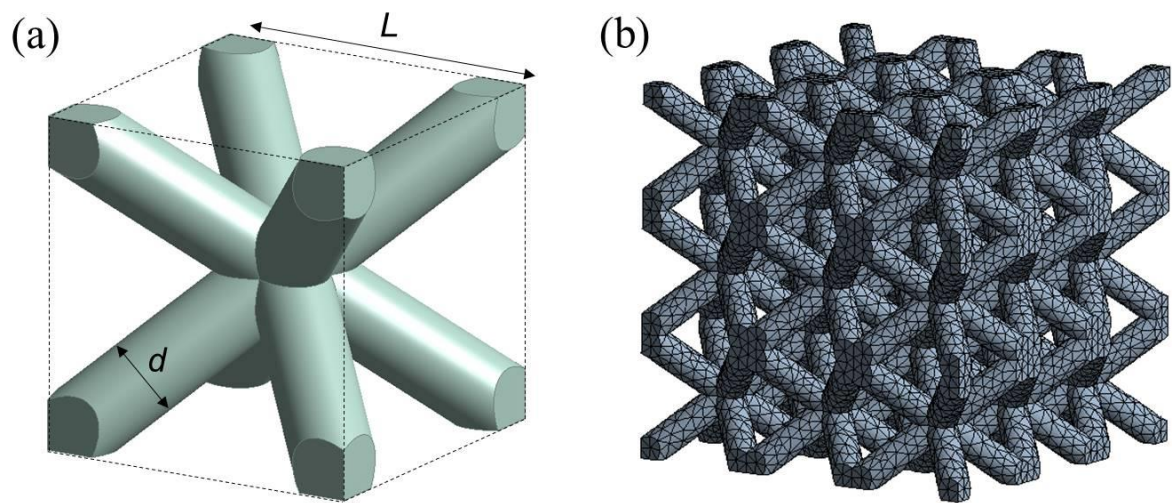

**Figure S6.** Detailed porous lattice unit cell structure used in FE simulations. We varied the  $d/L$  of the unit cell, where  $d$  is the diameter of the strut and  $L$  is the length of the cube unit cell

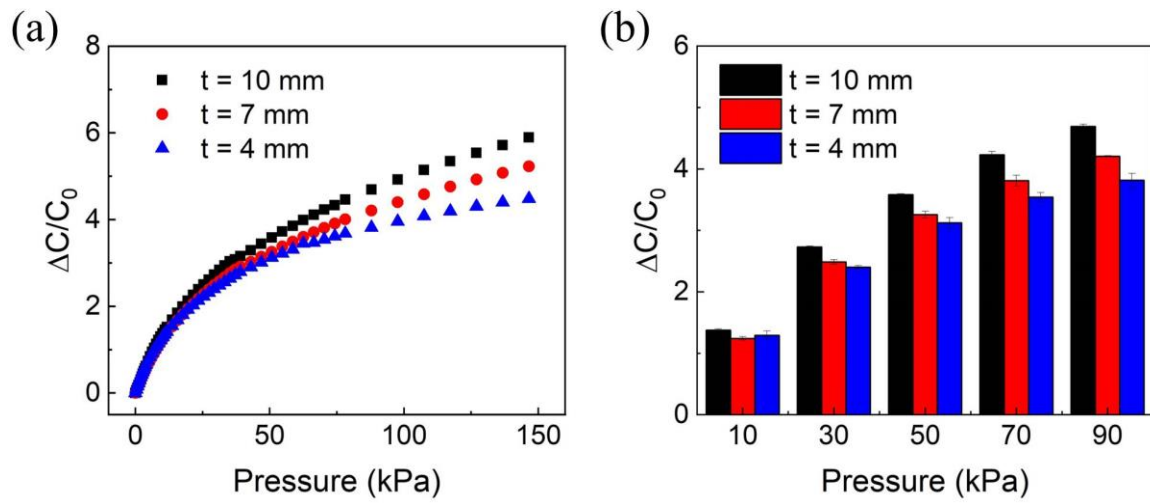

**Figure S7.** Sensing performance results for pressure sensors of different thicknesses. (a) Measurement capacitance variation with different thicknesses. (b) Comparison of capacitance values at applied pressure.

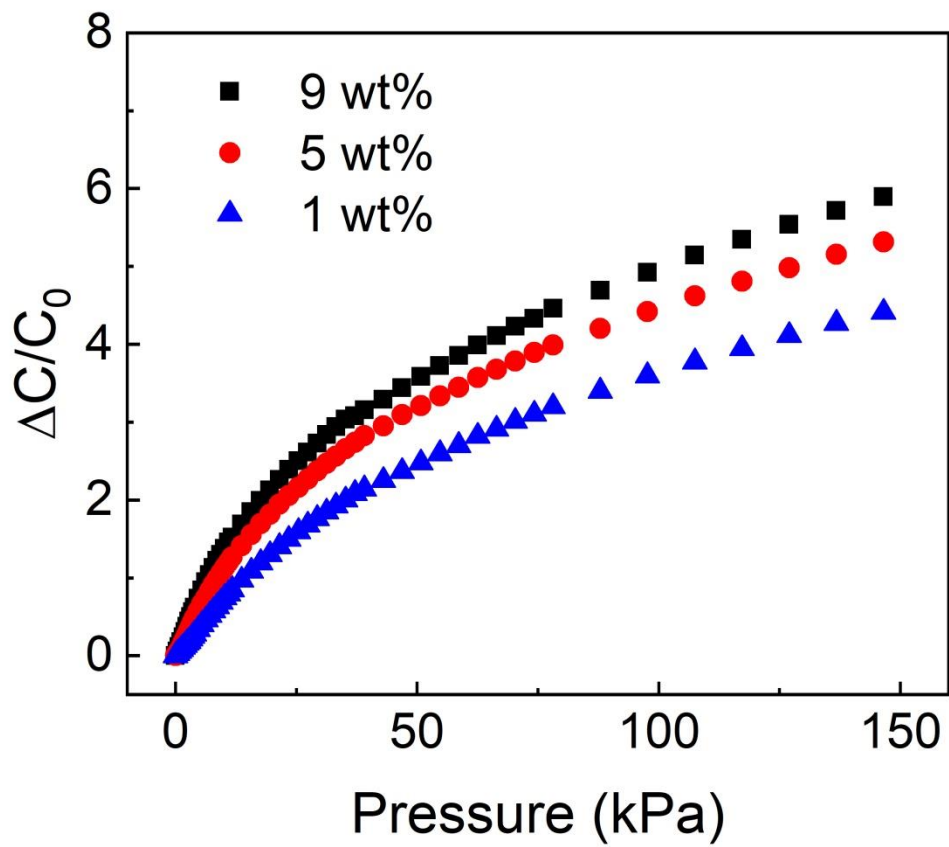

**Figure S8.** Sensing performance results for pressure sensors of MS concentration.



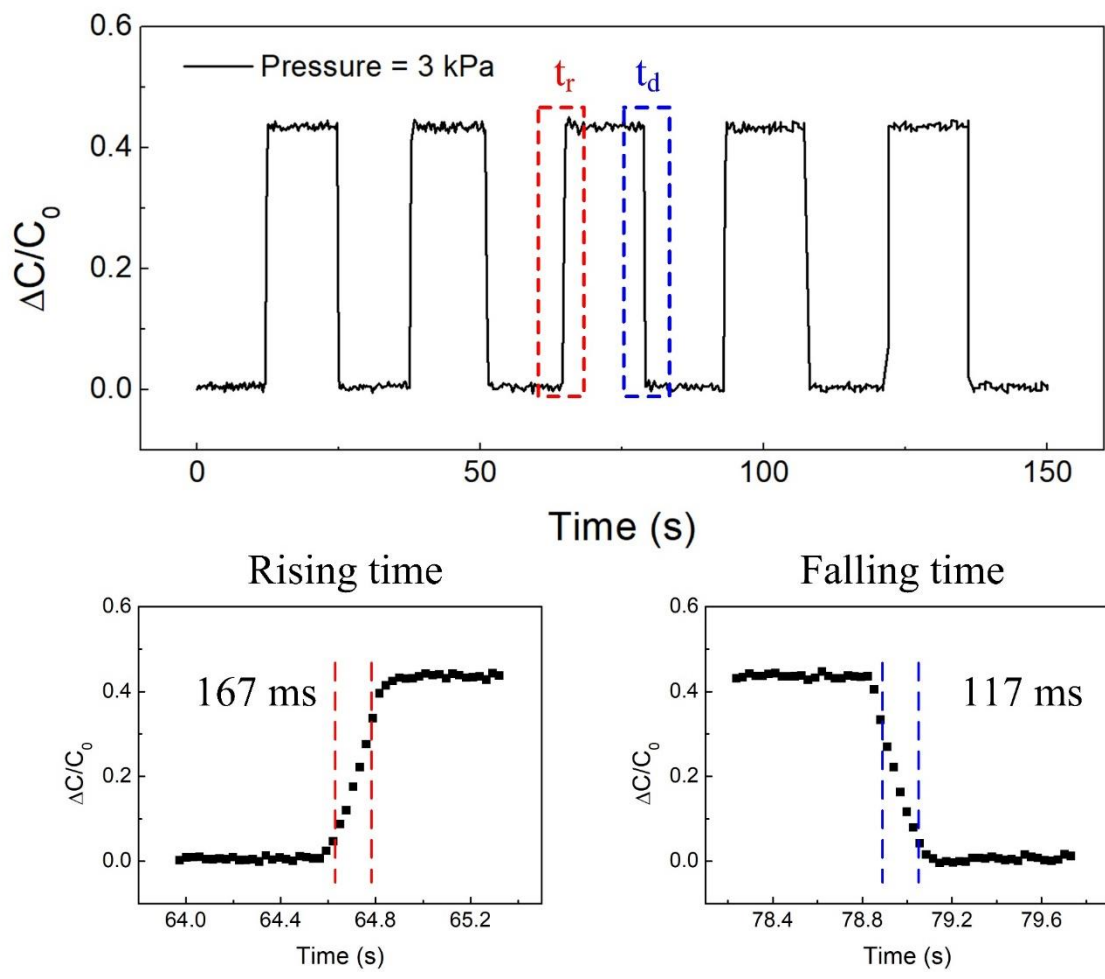

**Figure S9.** Response time of PDMS/MS sensor for loading 3 kPa. The 10% to 90% rise time ( $t_r$ ) and the 90% to 10% fall time ( $t_d$ ) are measured as 167 ms and 117 ms, respectively.

**Table S1.** Material properties of the porous PDMS structure and PDMS/MS composite with different MS weights. Properties investigated include density, porosity, compressive stress at 60% compressive strain, and Young's modulus at 10% compressive strain (linear section).

|                              | PDMS<br>structure | PDMS/MS composite |       |       |
|------------------------------|-------------------|-------------------|-------|-------|
|                              |                   | 1 wt%             | 5 wt% | 9 wt% |
| Density (g/cm <sup>3</sup> ) | 0.277             | 0.219             | 0.211 | 0.195 |
| Porosity (%)                 | 65.3              | 72.7              | 73.6  | 75.6  |
| Compressive stress (kPa)     | 42.98             | 32.6              | 23.4  | 14.06 |
| Young's modulus (kPa)        | 2.27              | 1.80              | 1.37  | 0.73  |

**Table S2.** Summarization of the reports on capacitive pressure sensor based on porous PDMS structure with nanoparticles.

| Materials and structure        | Sensitivity (kPa <sup>-1</sup> ) | Pressure range | Response time (ms) | Reliability               | ref       |
|--------------------------------|----------------------------------|----------------|--------------------|---------------------------|-----------|
| Calcium copper titanate / PDMS | 1.66 (0~640 Pa)                  | 1.4 kPa        | <33                | None                      | [1]       |
| Silver nanoparticles / PDMS    | 0.0072                           | 100 kPa        | None               | 5,000 times / 50, 100 kPa | [2]       |
| Carbon nanoparticles / PDMS    | 1.1 (0~10 kPa)                   | 100 kPa        | < 60               | 11,000 times / 0.4 kPa    | [3]       |
| Microsphere / PDMS             | 0.124 (0~15 kPa)                 | 150 kPa        | < 117              | 1,000 times / 2.5 kPa     | This work |

1. Mu, C.; Li, J.; Song, Y.; Huang, W.; Ran, A.; Deng, K.; Huang, J.; Xie, W.; Sun, R.; Zhang, H. Enhanced Piezocapacitive Effect in CaCu<sub>3</sub>Ti<sub>4</sub>O<sub>12</sub>-Polydimethylsiloxane Compositing Sponge for Ultrasensitive Flexible Capacitive Sensor. *ACS Appl. Nano Mater.* 2018, 1, 274–283, doi:10.1021/acsanm.7b00144.

2. Liu, S.Y.; Lu, J.G.; Shieh, H.P.D. Influence of Permittivity on the Sensitivity of Porous Elastomer-Based Capacitive Pressure Sensors. *IEEE Sens. J.* 2018, 18, 1870–1876, doi:10.1109/JSEN.2017.2789242.

3. Peiqi Wei, Xiaoliang Guo, Xianbo Qiu, D.Y. Flexible capacitive pressure sensor with sensitivity and linear measuring range enhanced based on porous composite of carbon conductive paste and polydimethylsiloxane. *Nanotechnology* 2019, 30.

## Theoretical analysis of capacitance

The capacitance of the parallel-plate capacitor is related by

$$C = \varepsilon_0 \varepsilon_r \frac{A}{d} \quad (\text{S2})$$

Where,  $\varepsilon_0$  is the vacuum permittivity,  $\varepsilon_r$  is the relative permittivity,  $A$  is the area of the electrode, and  $d$  is the distance between the two parallel sensing electrodes. The relative change in capacitance is calculated as follows:

$$\frac{\Delta C}{C_0} = \frac{C - C_0}{C_0} = \frac{C}{C_0} - 1 \quad (\text{S3})$$

Under the applied pressure, the distance of two electrodes and relative permittivity are changed as the compressive distance ( $d_c$ ) and effective relative permittivity ( $\varepsilon'$ ). Substituting the initial and compression state capacitance, we get

$$\frac{\Delta C}{C_0} = \frac{\varepsilon_0 \varepsilon_r' \frac{A}{d_c} - 1}{\varepsilon_0 \varepsilon_r \frac{A}{d_0}} = \frac{d_0 \varepsilon_r'}{d_c \varepsilon_r} - 1 \quad (\text{S4})$$

We expressed the relative permittivity as a function of initial vacuum fraction (porosity) of the PDMS structure  $f_0$ , the relative dielectric constant of air  $\varepsilon_a$ , and the relative permittivity of the polymer  $\varepsilon_p$ .

$$\varepsilon_r = f_0 \times \varepsilon_a + (1 - f_0) \times \varepsilon_p, \varepsilon_r' = f \times \varepsilon_a + (1 - f) \times \varepsilon_p \quad (\text{S5})$$

Thus, relative change in capacitance is calculated as follows:

$$\frac{\Delta C}{C_0} = \frac{d_0}{d_c} \left\{ \frac{f \times \varepsilon_a + (1 - f) \times \varepsilon_p}{f_0 \times \varepsilon_a + (1 - f_0) \times \varepsilon_p} \right\} - 1 \quad (\text{S6})$$

We assumed the vacuum fraction  $f'$  decreases linearly with the compressive strain  $\epsilon$ ,

$$f = f_0 - a\epsilon \quad (\text{S7})$$

Where,  $a$  is the arbitrary constant,  $\epsilon$  is the strain.

$$\frac{\Delta C}{C_0} = \frac{d_0}{d_c} \left\{ \frac{(f_0 - a\epsilon) \times \epsilon_a + (1 - f_0 + a\epsilon) \times \epsilon_p}{f_0 \times \epsilon_a + (1 - f_0) \times \epsilon_p} \right\} - 1 \quad (\text{S8})$$

Simplifying the equation, we get

$$\frac{\Delta C}{C_0} = \frac{d_0}{d_c} \left\{ \frac{(f_0 \times \epsilon_a + (1 - f_0) \times \epsilon_p)}{f_0 \times \epsilon_a + (1 - f_0) \times \epsilon_p} + \frac{a\epsilon \epsilon_p - a\epsilon \epsilon_a}{f_0 \times \epsilon_a + (1 - f_0) \times \epsilon_p} \right\} - 1 \quad (\text{S9})$$

Substituting the values  $\epsilon_a = 1$ ,  $\epsilon_p = 3$ , in Eq S9, we get

$$\frac{\Delta C}{C_0} = \frac{d_0}{d_c} \left( 1 + \frac{3a\epsilon - a\epsilon}{f_0 \times 3 - 3f_0} \right) - 1 \quad (\text{S10})$$

The relative change in capacitance is then given by the equation:

$$\frac{\Delta C}{C_0} = \frac{d_0}{d_c} \left( 1 - \frac{2a\epsilon}{2f_0 - 3} \right) - 1 \quad (\text{S11})$$

### **Analytical calculation of capacitance**

We assume the vacuum fraction  $f'$  decreases linearly with the compressive strain  $\epsilon$ .

$$f = f_0 - a\epsilon \quad (\text{S12})$$

If we assume that the porous structure is fully compressed at the 60% strain (compressed air fraction is zero), the equation can be written as,

$$0 = f_0 - a \times 0.6 \quad (\text{S13})$$

The porosity of the PDMS structure and PDMS/MS composite is 65.3% (0.653) and 75.6% (0.756), respectively. The arbitrary constants of the PDMS structure and PDMS/MS composite are 1.088 and 1.26, respectively. If the porosity and arbitrary constant are substituted in the equation S10, the equation becomes a function that is determined only by the strain. The strain increased by 2% for a 0 to 60% strain range.
